# Supplementary material
Source: Springer Nature journal article supplement (https://www.springermedizin.de/resource/supplementary/12891_2013_2164_MOESM1_ESM.pdf/9509568)
Supplement: MOESM1 [file 9509568]

**Number of Physicians in EMERALD Meeting Inclusion Criteria**  
n=83

**Patients (aged  $\geq 20$ y) meeting inclusion criteria**  
n=73,014

**Patients (aged  $\geq 65$ y) Meeting Inclusion Criteria**  
n=14,353

**Random Sample of Patients (aged  $\geq 20$ y)**  
n=7500

**RA prevalence among adults aged  $\geq 20$ y: 0.9%**

**RA Patients (aged  $\geq 20$ y)**  
n=69

**Non-RA Patients (aged  $\geq 20$ y)**  
n=7431

**n=7500**

**RA Patients (aged  $\geq 65$ y)**  
n=25

**Non-RA Patients (aged  $\geq 65$ y)**  
n=1401

**Random Sample of Patients (aged  $\geq 65$ y)**  
n=2000

**RA prevalence among adults aged  $\geq 65$ y: 1.8%**

**RA Patients (aged  $\geq 65$ y)**  
n=63

**Non-RA Patients (aged  $\geq 65$ y)**  
n=3363

**n=3426**

**RA Patients (aged  $\geq 65$ y)**  
n=38

**Non-RA Patients (aged  $\geq 65$ y)**  
n=1962
